# Supplementary material for: Enhancement of Hydrogen Adsorption on Spray-Synthesized HKUST-1 via Lithium Doping and Defect Creation
Source: MDPI journal article supplement (doi:10.3390/ma16155416), 2023-08-02
Supplement: s1 [file s1]

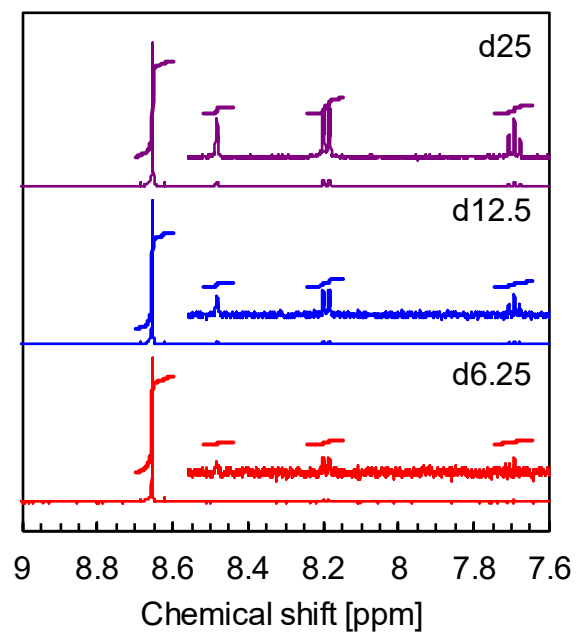

Figure S1  $^1\text{H}$  NMR spectra of d-HKUST-1 digested in DCl/DMSO- $d_6$  mixture.

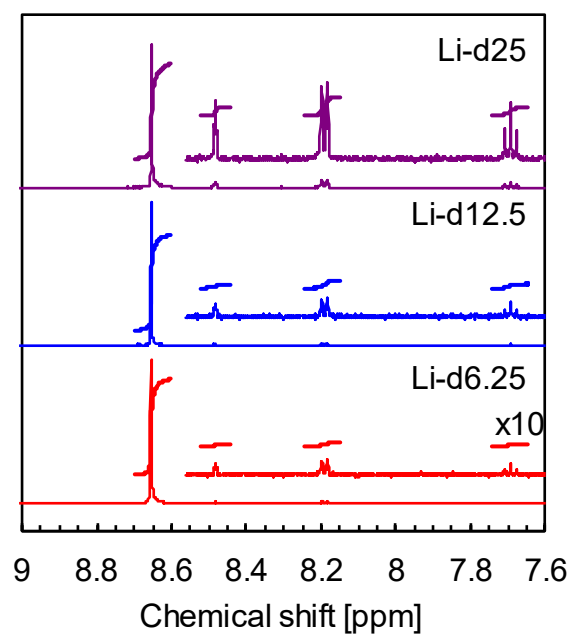

Figure S2  $^1\text{H}$  NMR spectra of Li-d-HKUST-1 digested in DCl/DMSO- $d_6$  mixture.

Table S1 Comparison of Li doping agent, Li/metal ratio, surface area, and H<sub>2</sub> uptake at 77 K and 1 bar for other Li-doped MOFs.

| MOFs                                                                                                               | Li agent                          | Li/metal<br>[mol%] | BET<br>surface area<br>[m <sup>2</sup> /g] | H <sub>2</sub> uptake<br>[wt%] | Ref.      |
|--------------------------------------------------------------------------------------------------------------------|-----------------------------------|--------------------|--------------------------------------------|--------------------------------|-----------|
| HKUST-1                                                                                                            | 0                                 | 0                  | 1705                                       | 2.37                           | This work |
| Li-10                                                                                                              | Li(NO <sub>3</sub> ) <sub>2</sub> | 0.29               | 1548                                       | 2.37                           | This work |
| Li-20                                                                                                              | Li(NO <sub>3</sub> ) <sub>2</sub> | 0.24               | 1706                                       | 2.47                           | This work |
| Li-200                                                                                                             | Li(NO <sub>3</sub> ) <sub>2</sub> | 0.93               | 1251                                       | 1.94                           | This work |
| Li-d6.25                                                                                                           | Li(NO <sub>3</sub> ) <sub>2</sub> | 0.64               | 1687                                       | 2.63                           | This work |
| Li-d12.5                                                                                                           | Li(NO <sub>3</sub> ) <sub>2</sub> | 0.85               | 1544                                       | 3.03                           | This work |
| Li-d25                                                                                                             | Li(NO <sub>3</sub> ) <sub>2</sub> | 0.51               | 1330                                       | 2.14                           | This work |
| Me <sub>2</sub> NH <sub>2</sub> [In(L <sub>1</sub> )] <sup>a</sup>                                                 | –                                 | 0                  | 820                                        | 1.39                           | [33]      |
| Li <sub>0.5</sub> (H <sub>3</sub> O) <sub>0.5</sub> [In(L <sub>1</sub> )] <sup>a</sup>                             | LiCl                              | 50                 | 1024                                       | 1.66                           | [33]      |
| [H <sub>2</sub> ppz][In <sub>2</sub> (L <sub>2</sub> ) <sub>2</sub> ] <sup>b</sup>                                 | –                                 |                    | 180                                        | 0.96                           | [16]      |
| Li <sub>1.5</sub> [H <sub>3</sub> O] <sub>0.5</sub> [In <sub>2</sub> (L <sub>2</sub> ) <sub>2</sub> ] <sup>b</sup> | LiCl                              | 75                 | 580                                        | 1.02                           | [16]      |
| Zn <sub>2</sub> (NDC) <sub>2</sub> (diPyTz)                                                                        | –                                 | 0                  | 400                                        | 1.12                           | [34]      |
| Li · Zn <sub>2</sub> (NDC) <sub>2</sub> (diPyTz)                                                                   | Li-Naph <sup>c</sup>              | 5                  | 526                                        | 1.46                           | [34]      |
| DO-MOF                                                                                                             |                                   | 0                  | 810                                        | 1.23                           | [19]      |
| DO-MOF-Li0.20                                                                                                      | LiOtBu <sup>d</sup>               | 10                 | 840                                        | 1.32                           | [19]      |
| DO-MOF-Li2.62                                                                                                      | LiOtBu <sup>d</sup>               | 262                | 270                                        | 0.77                           | [19]      |
| HKUST-1                                                                                                            | –                                 | 0                  | 1587                                       | 2.41                           | [35]      |
| Li-HKUST-1                                                                                                         | Li-Naph <sup>c</sup>              | 7                  | 795                                        | 3.50                           | [35]      |
| MIL-101(Cr)                                                                                                        | –                                 | 0                  | 2537                                       | 2.37                           | [35]      |
| Li-MIL-101(Cr)                                                                                                     | Li-Naph <sup>c</sup>              | 1                  | 1840                                       | 3.39                           | [35]      |
| MIL-53(Al)                                                                                                         | –                                 |                    | 976                                        | 1.66                           | [15]      |
| Li-MIL-53(Al)                                                                                                      | Li(NO <sub>3</sub> ) <sub>2</sub> | 4                  | 958                                        | 1.84                           | [15]      |
| MOF-5-OH-0.38                                                                                                      | –                                 | 0                  | 3220                                       | 1.23                           | [17]      |
| MOF-5-Oli                                                                                                          | LDA <sup>e</sup>                  | 19                 | 3190                                       | 1.39                           | [17]      |
| RHA-MIL-101                                                                                                        | –                                 | 0                  | 2525                                       | 1.54                           | [18]      |
| 0.06Li-RHA-MIL-101                                                                                                 | Li(NO <sub>3</sub> ) <sub>2</sub> | 0.06 wt%           | 2942                                       | 2.65                           | [18]      |
| 0.3Li-RHA-MIL-101                                                                                                  | Li(NO <sub>3</sub> ) <sub>2</sub> | 0.32 wt%           | 2141                                       | 2.42                           | [18]      |
| 0.6Li-RHA-MIL-101                                                                                                  | Li(NO <sub>3</sub> ) <sub>2</sub> | 0.63 wt%           | 1825                                       | 1.69                           | [18]      |
| 6.0Li-RHA-MIL-101                                                                                                  | Li(NO <sub>3</sub> ) <sub>2</sub> | 6.09 wt%           | 1073                                       | 1.58                           | [18]      |

<sup>a</sup>H<sub>4</sub>L<sub>1</sub> = biphenyl-3,3',5,5'-tetracarboxylic acid; <sup>b</sup>H<sub>4</sub>L<sub>2</sub> = 1,1',4',1'',4'',1'''-quaterphenyl-3,5,3'',5'''-tetracarboxylic acid; <sup>c</sup>Li-Naph = lithium naphthalene; <sup>d</sup>LiOtBu = Lithium tert-Butoxide; <sup>e</sup>LDA = Lithium diisopropylamide

## References

15. Kubo, M.; Shimojima, A.; Okubo, T. Effect of Lithium Doping into MIL-53(Al) through Thermal Decomposition of Anion Species on Hydrogen Adsorption. *J. Phys. Chem. C* **2012**, *116*, 10260–10265.

16. Yang, S.; Lin, X.; Blake, A.J.; Walker, G.S.; Hubberstey, P.; Champness, N.R.; Schröder, M. Cation-Induced Kinetic Trapping and Enhanced Hydrogen Adsorption in a Modulated Anionic Metal–Organic Framework. *Nat. Chem.* **2009**, *1*, 487–493.
17. Kubo, M.; Hagi, H.; Shimojima, A.; Okubo, T. Facile Synthesis of Hydroxy-Modified MOF-5 for Improving the Adsorption Capacity of Hydrogen by Lithium Doping. *Chem. Asian J.* **2013**, *8*, 2801–2806.
18. Panchariya, D.K.; Kumar, E.A.; Singh, S.K. Lithium-Doped Silica-Rich MIL-101(Cr) for Enhanced Hydrogen Uptake. *Chem. Asian J.* **2019**, *14*, 3728–3735.
19. Mulfort, K.L.; Farha, O.K.; Stern, C.L.; Sarjeant, A.A.; Hupp, J.T. Post-Synthesis Alkoxide Formation within Metal-Organic Framework Materials: A Strategy for Incorporating Highly Coordinatively Unsaturated Metal Ions. *J. Am. Chem. Soc.* **2009**, *131*, 3866–3868.
33. Yang, S.; Lin, X.; Blake, A.J.; Thomas, K.M.; Hubberstey, P.; Champness, N.R.; Schröder, M. Enhancement of H<sub>2</sub> Adsorption in Li<sup>+</sup>-Exchanged Co-Ordination Framework Materials. *Chem. Commun.* **2008**, 6108–6110.
34. Mulfort, K.L.; Wilson, T.M.; Wasielewski, M.R.; Hupp, J.T. Framework Reduction and Alkali-Metal Doping of a Triply Catenating Metal-Organic Framework Enhances and Then Diminishes H<sub>2</sub> Uptake. *Langmuir* **2009**, *25*, 503–508.
35. Xiang, Z.; Hu, Z.; Yang, W.; Cao, D. Lithium Doping on Metal-Organic Frameworks for Enhancing H<sub>2</sub> Storage. *Int. J. Hydrogen Energy* **2012**, *37*, 946–950.
